# Supplementary material for: Improved Kaplan-Meier Estimator in Survival Analysis Based on Partially Rank-Ordered Set Samples
Source: Comput Math Methods Med. 2020 May 29;2020:7827434. doi: 10.1155/2020/7827434 (PMC7296468; doi:10.1155/2020/7827434)
Supplement: Supplementary Materials — This supplementary file includes the data for the Section 6 (real data) example in the paper. This file contains the information of children under 18 years of age with nonhematological disorders such as Beta-Thalassemia and Idiopathic Thrombocytopenic Purpura (ITP) and children with hematological malignancies including various types of lymphoma and Acute Lymphocytic Leukemia (ALL), registered in Amir Medical Oncology Center during May 2014 to August 2017. The dataset contains the survival information of 61 patients. [file 7827434.f1.xlsx]

## Sheet: Sheet1
survival time	status	WBC
12.7	0	14400
9.9	0	8500
5.4	0	11200
24.4	0	11300
22.1	0	17500
35.9	0	9300
8.8	0	8300
16.7	0	10500
18.3	0	400
12	0	7400
11.7	0	8300
11.1	1	2600
63.4	0	4800
26.1	0	4300
10.7	0	14000
33.1	0	12200
35.3	0	9700
9.5	0	8600
30.6	0	6300
14.1	0	10400
1.2	1	500
32.9	0	9200
1.2	1	4700
0.7	1	700
0	1	100
1.2	1	1400
0.9	1	1700
1.5	1	2500
0.4	1	100
0.6	1	600
0	1	300
5.7	1	100
9.2	0	8200
0.5	1	100
2.1	0	2300
56.5	0	6700
2.9	1	200
0.3	0	8900
0.9	1	100
13.9	0	7700
1	1	200
1.8	1	1000
2.6	1	1400
0	1	6900
3.8	1	500
0.8	0	5800
1	1	400
9.9	0	4000
5.2	0	10400
0.4	0	530
7.8	1	100
1.3	0	9200
1	1	200
1.6	1	500
0.3	1	4900
0.7	1	500
0.2	1	800
1.9	1	2400
1.6	1	1000
0.3	1	700
6.2	0	5600
